# Supplementary material
Source: publisher figshare collection journal article supplement (https://acs.figshare.com/ndownloader/files/11054660)
Supplement: Supplementary file 1 [file 11054660]

*Supporting information*

**WO<sub>x</sub>@PEDOT Core-Shell Nanorods: Hybrid Hole-Transporting  
Materials for Efficient and Stable Perovskite Solar Cells**

Ping Liu,<sup>a,b</sup> Chen Wang,<sup>a,b</sup> Dongying Zhou,<sup>a,b</sup> Quan Yuan,<sup>a,b</sup> Yu Wang,<sup>a,b</sup> Yao Hu,<sup>a,b</sup> Dongwei  
Han,<sup>a,b</sup> Lai Feng<sup>a,b,\*</sup>

<sup>a</sup> *Soochow Institute for Energy and Materials Innovations, College of Physics, Optoelectronics  
and Energy, Soochow University, Suzhou 215006, China*

<sup>b</sup> *Jiangsu Key Laboratory of Advanced Carbon Materials and Wearable Energy Technologies,  
Soochow University, Suzhou 215006, China*

*\*Corresponding author (Tel: +86 512 65223650; E-mail address: fenglai@suda.edu.cn (Lai  
Feng))*

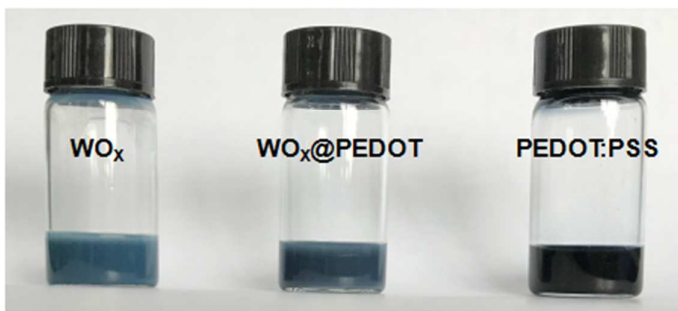

**Figure S1.** Photos of the samples of WO<sub>x</sub> NWs, WO<sub>x</sub>@PEDOT and PEDOT:PSS.

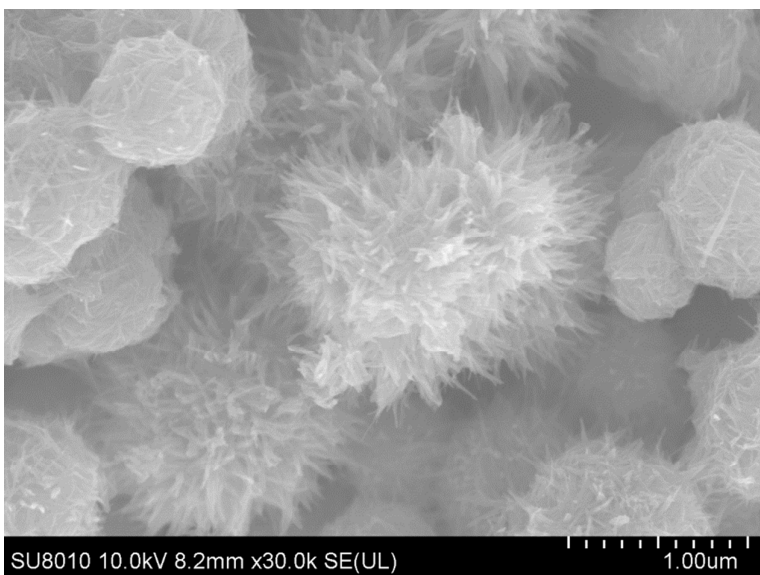

**Figure S2.** SEM image of as-prepared WO<sub>x</sub> NWs.

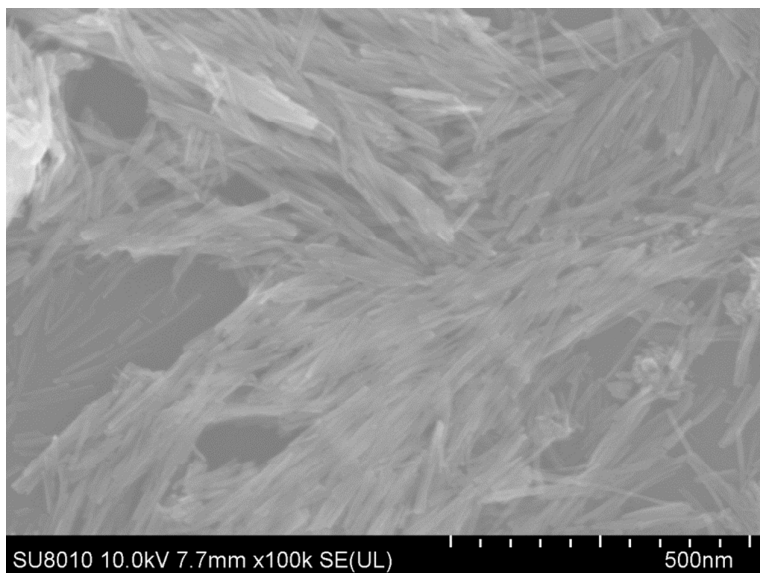

**Figure S3.** SEM image of  $\text{WO}_x$  NWs obtained after constant stirring in aqueous solution without EDOT.

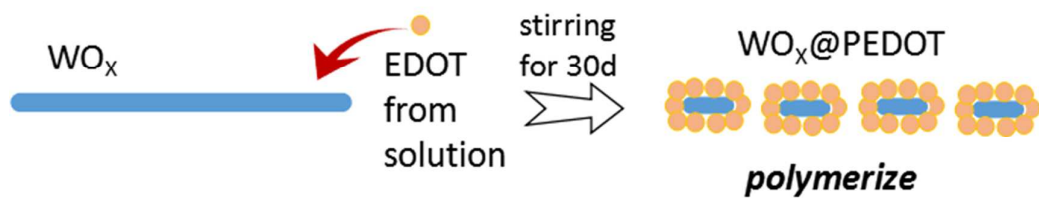

**Figure S4.** Schematic illustration of the truncation process to produce  $\text{WO}_x\text{@PEDOT}$  NRs from  $\text{WO}_x$  NWs.

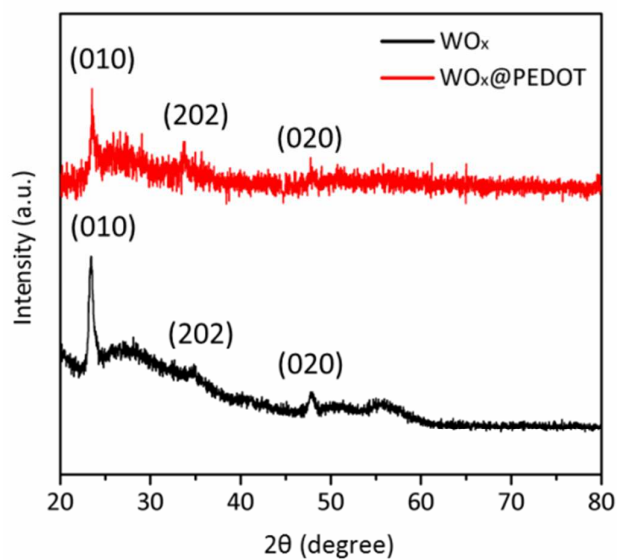

**Figure S5.** XRD patterns of  $\text{WO}_x$  NWs and  $\text{WO}_x\text{@PEDOT}$  NRs.

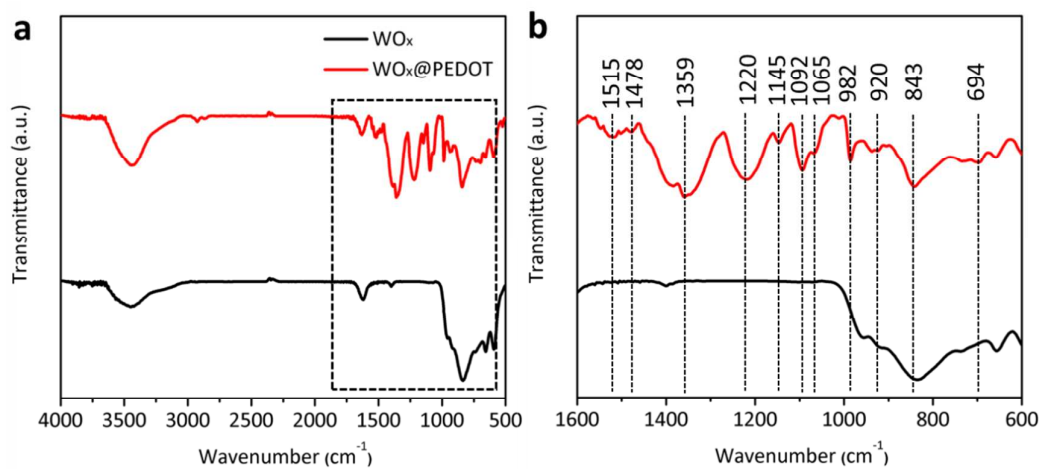

**Figure S6.** (a,b) FT-IR full and highlighted spectra of  $\text{WO}_x$  NWs and  $\text{WO}_x\text{@PEDOT}$

NRs.

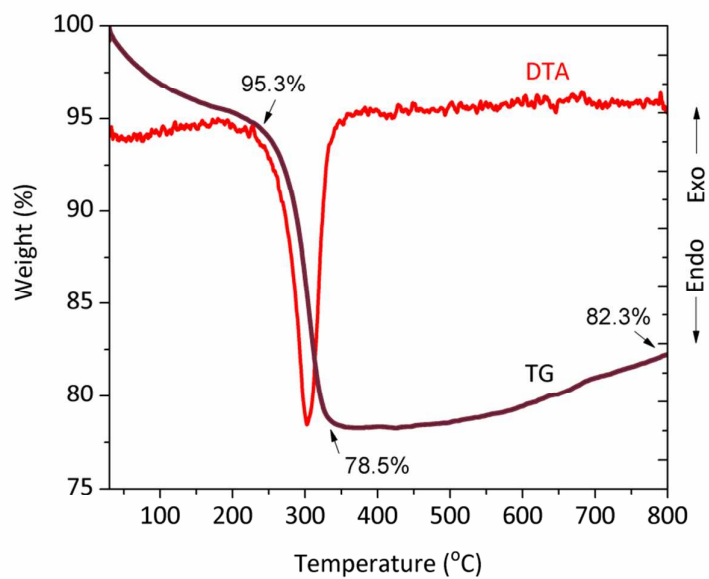

**Figure S7.** TGA profile of  $\text{WO}_x\text{@PEDOT}$  NRs measured in air atmosphere.

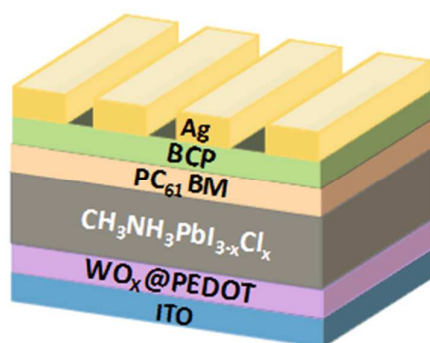

**Figure S8.** Device architecture of solution-processed planar p-i-n PeSC.

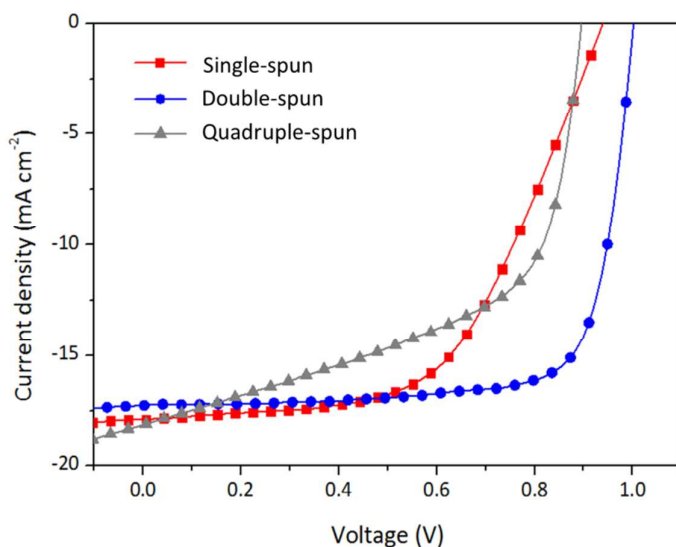

**Figure S9.**  $J$ - $V$  curves of PeSCs containing single, double, and quadruple-spun  $\text{WO}_x$ @PEDOT layers.

**Table S1.** Photovoltaic parameters extracted from the devices containing single, double, and quadruple-spun  $\text{WO}_x$ @PEDOT layers.

| HTL                                           | $V_{oc}$ (V) | $J_{sc}$ (mA/cm <sup>2</sup> ) | FF(%) | PCE (%) |
|-----------------------------------------------|--------------|--------------------------------|-------|---------|
| Single-spun<br>$\text{WO}_x$ @PEDOT layer     | 0.94         | 17.88                          | 56.0  | 9.40    |
| Double-spun<br>$\text{WO}_x$ @PEDOT layers    | 1.00         | 17.25                          | 76.8  | 13.24   |
| Quadruple-spun<br>$\text{WO}_x$ @PEDOT layers | 0.89         | 18.08                          | 56.1  | 9.04    |

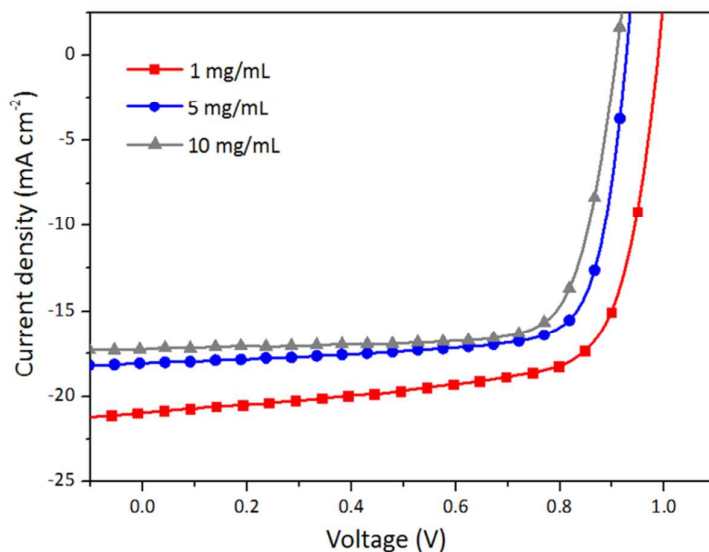

**Figure S10.**  $J$ – $V$  curves of PeSCs with  $\text{WO}_x\text{@PEDOT:PEDOT:PSS}$  prepared using the  $\text{WO}_x\text{@PEDOT}$  solution with the concentration of 1 mg/mL, 5 mg/mL and 10 mg/mL.

**Table S2.** Photovoltaic parameters extracted from the devices with  $\text{WO}_x\text{@PEDOT:PEDOT:PSS}$  prepared using the  $\text{WO}_x\text{@PEDOT}$  solution with the concentration of 1 mg/mL, 5 mg/mL and 10 mg/mL.

| $\text{WO}_x\text{@PEDOT}$ solution | $V_{oc}$ (V) | $J_{sc}$ (mA/cm <sup>2</sup> ) | FF (%) | PCE (%) |
|-------------------------------------|--------------|--------------------------------|--------|---------|
| 1 mg/mL                             | 0.99         | 20.93                          | 71.3   | 14.73   |
| 5 mg/mL                             | 0.93         | 18.04                          | 76.1   | 12.74   |
| 10 mg/mL                            | 0.90         | 17.24                          | 77.4   | 12.04   |

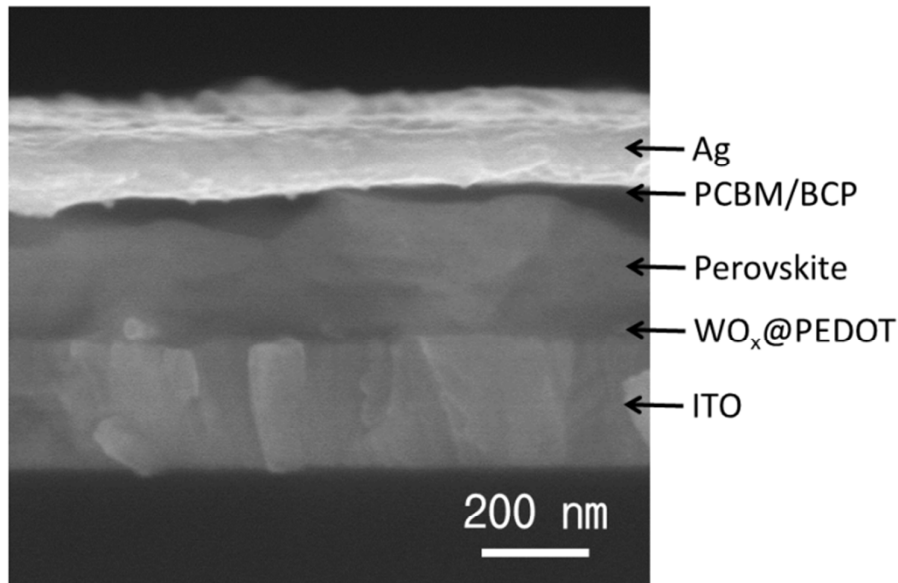

**Figure S11.** Cross-sectional SEM image of typical device with WO<sub>x</sub>@PEDOT NRs.

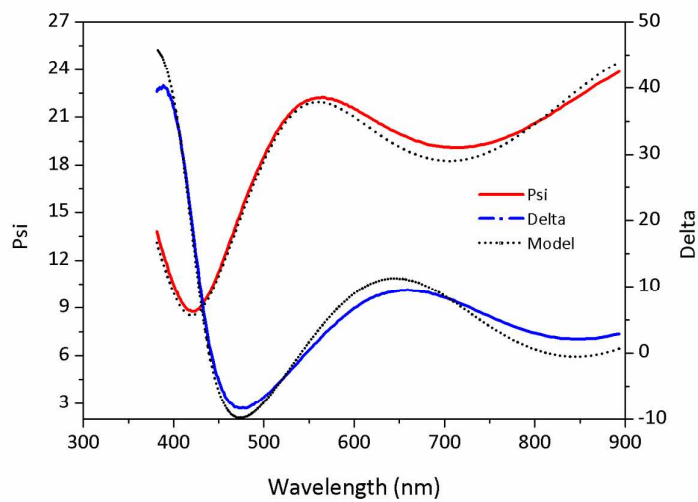

**Figure S12.** Ellipsometric raw data (i.e.  $\Psi$  and  $\Delta$ ) as a function of wavelength collected from ITO/WO<sub>x</sub>@PEDOT film.

The optical models, representing the general structure of the tested samples, were built as “ITO(150 nm)/WO<sub>x</sub>@PEDOT(Thickness, fit)” for. By fitting, the thickness of the WO<sub>x</sub>@PEDOT HTL is estimated to be ca. 22 nm.



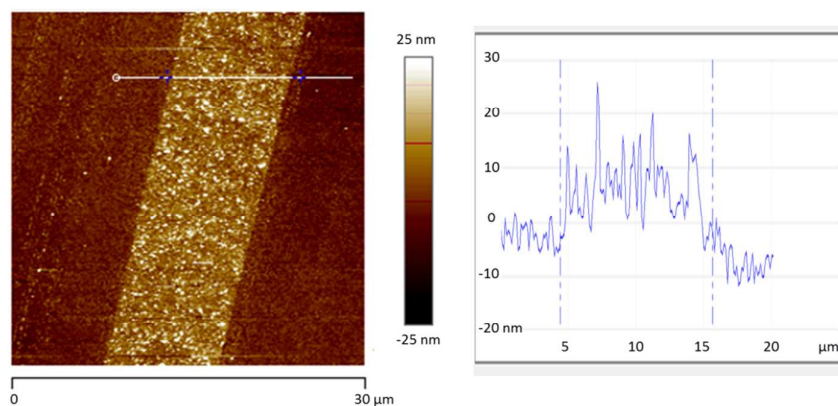

**Figure S13.** Left panel shows AFM height image of the WO<sub>x</sub>@PEDOT HTL deposited on ITO. The light region indicates the WO<sub>x</sub>@PEDOT HTL, while the dark region indicates the pristine ITO where the WO<sub>x</sub>@PEDOT HTL was removed by knife scratching. Right panel displays a height trace, suggesting an average HTL thickness of ca. 20 nm.

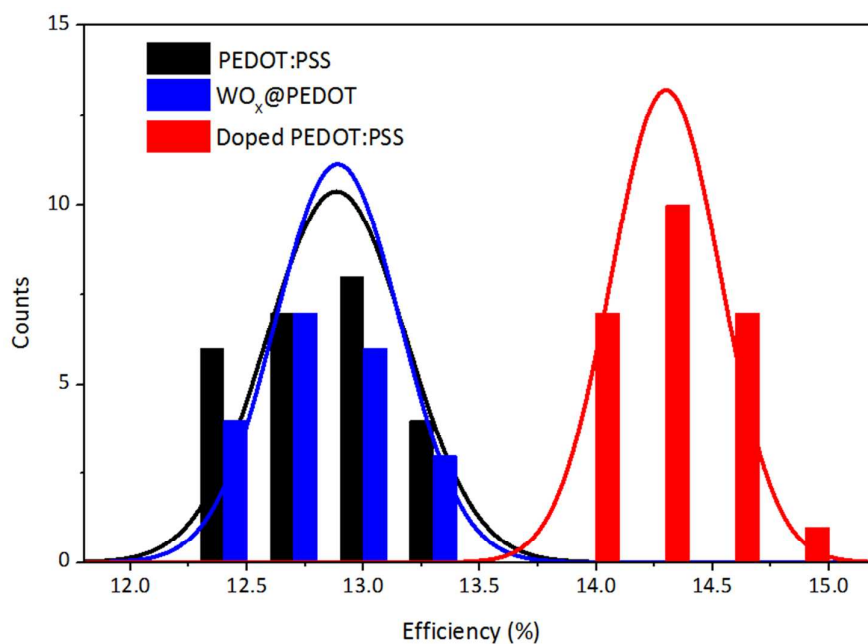

**Figure S14.** PCE distributions for PeSCs with different HTLs.

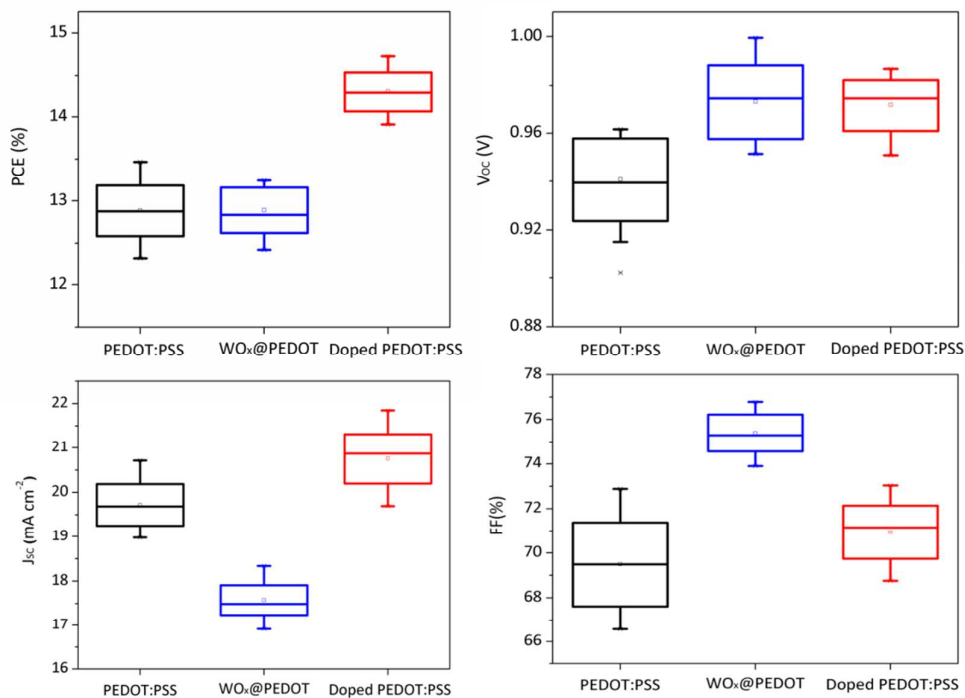

**Figure S15.** Histogram of PCE and  $V_{OC}$ ,  $J_{SC}$ , FF of 20-25 individual solar cells under 1 sun illumination.

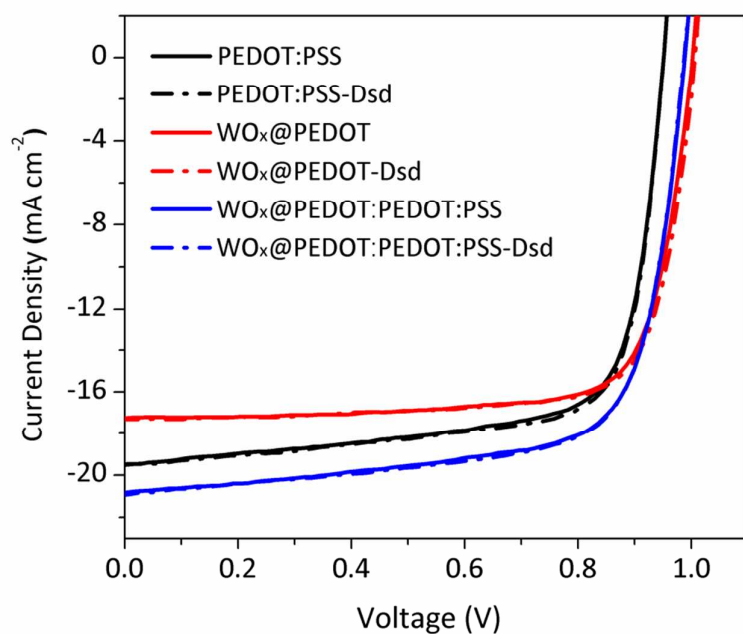

**Figure S16.**  $J$ - $V$  curves of PeSCs with different HTLs with both forward (FS) and reverse (RS) scan modes under 1 sun illumination.

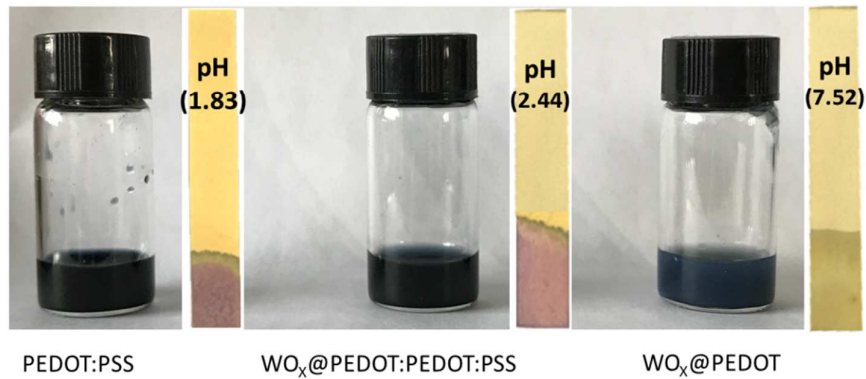

**Figure S17.** Photos of the samples of PEDOT:PSS, WO<sub>x</sub>@PEDOT and WO<sub>x</sub>@PEDOT:PSS. The insets show their PH values.
